# Supplementary material for: Development and Validation of a Novel Radiomics-Based Nomogram With Machine Learning to Preoperatively Predict Histologic Grade in Pancreatic Neuroendocrine Tumors
Source: Front Oncol. 2022 Mar 31;12:843376. doi: 10.3389/fonc.2022.843376 (PMC9008322; doi:10.3389/fonc.2022.843376)
Supplement: Supplementary file 2 [file DataSheet_2.xlsx]

## Sheet: Sheet1
SN	WHO	ENET	T	BiliaryPancreaticDuctDilation	UB
0001	2	10	3	0	0
0002	2	9	3	1	0
0003	2	5	2	1	1
0004	2	10	2	1	0
0006	1	5	2	1	0
0008	2	8	4	1	0
0012	2	5	2	0	0
0013	2	5	2	0	0
0015	2	9	1	0	0
0016	2	10	2	0	1
0017	1	1	1	1	0
0018	2	1	1	0	0
0019	2	6	3	1	0
0022	1	1	1	0	0
0025	3	8	4	0	1
0026
0027	1	1	1	0	0
0031	2	5	2	0	0
0032	2	8	4	1	0
0033	1	5	2	0	0
0035	1	6	3	0	0
0036	3	10	4	0	1
0037	2	6	3	0	1
0038	1	1	1	0	0
0039	2	10	3	0	0
0040	2	5	2	0	1
0041	2	9	3	1	0
0042	1	1	1	0	0
0043	2	6	3	1	0
0044	2	10	3	1	0
0045	3	1	2	1	0
0046	2	9	4	0	1
0047	1	1	1	1	0
0048	1	5	2	0	0
0050	2	9	4	0	1
0057	2	6	3	0	1
0059	1	1	1
0060	3	9	3	1	1
0061	1	1	1	0	0
0062	1	5	1	0	0
0064	2	10	3	0	0
0071	1	9	2	0	0
0073	2	10	3	0	1
0074	1	6	3	1	0
0083	1	5	2	0	0
0084	1	1	1	0	0
0087	2	6	3	0	1
0089	2	10	3	1	1
0090	3	5	2	1	0
0094	1	1	1	0	0
0095	2	6	3	0	0
0096	1	5	2	0	0
0097	1	5	2	0	0
0101	3	10	4	0	1
0102	1	6	3	0	1
0104	3	9	4	1	1
0106	2	5	2	1	0
0107	2	1	1	0	1
0108	2	5	2	0	1
0111	1	6	3	0	1
0113	2	1	1	0	0
0115	2	5	2	0	0
0121	2	5	2	0	0
0122	1	5	2	0	0
0123	3	6	3	1	1
0124	1	5	2	0	0
0126	1	1	1	0	0
0127	2	6	3	0	0
0128	1	5	2	0	0
0129	2	5	2	0	1
0131	1	1	1	0	0
0134	1	1	1	0	0
0140	2	9	3	1	1
0142	3	9	4	1	0
0143	2	1	1	0	0
0145	2	5	2	1	0
0149	2	6	3	1	1
0150	2	6	3	0	1
0162	1	5	2	0	1
0177	1	1	1	0	0
0181	2	6	3	0	0
0182	2	5	2	0	0
0185	2	5	2	1	0
0188	3	9	2	0	0
0192	2	5	2	0	0
0193	1	1	1	0	0
0194	2	5	2	0	0
0195	1	6	3	0	0
0196	1	1	1	0	0
0197	1	5	2	0	0
0198	1	5	2	0	0
0199	1	5	2	0	0
0200
0201	2	9	3	1	1
0202	1	1	1	0	0
0204	2	6	3	1	1
0209	1	6	3	1	0
0211	2	8	4	0	0
0212	1	6	3	0	0
0214
0215
0217	2	1	1	0	0
0220	1	1	1	0	0
0221
0222	2	6	3	1	0
0226	2	9	3	1	1
0236	2	6	3	0	0
0240	2	9	3	1	1
0242	1	5	2	0	0
0244	1	1	1	0	0
0245	2	10	3	0	0
0248	2	6	3	0	1
0249	1	1	1	0	0
0251	2	10	4	0	1
0252	2	10	4	0	1
0271	1	6	3	0	0
0283	1	1	1	0	0
0284	1	1	1	0	0
0292	2	6	3	1	0
0296	1	1	1	0	0
0299	2	6	3	0	0
0301	2	1	1	0	0
0303	3	10	4	0	0
0307	1	1	1	0	0
0313
0320	3	10	3	0	0
0338	1	1	1	0	0
0341	1	1	1	1	0
0343	2	5	2	0	0
0346	3	5	2	0	1
0349	2	6	3	1	1
0350	2	5	2	1	0
0351	1	5	2	0	0
0352	3	5	2	0	0
0353	3	9	3	1	0
0354	1	1	1	0	0
0355	1	5	2	0	0
0365	1	1	1	0	0
0368	2	5	2	0	1
0374	1	1	1	0	0
0380	2	1	1	0	0
0382	2	5	2	0	0
0386	2	8	4	0	0
0387	1	1	1	0	0
0438	2	10	2	1	0
0439	2	10	2	0	1
0440	1	5	2	0	0
0441	1	5	2	0	0
0442	2	6	3	0	0
0446	1	1	1	0	0
0448	2	5	2	0	0
0449	1	1	1	0	0
0450	1	1	1	0	0
0451	1	1	1	0	0
0455	2	6	3	1	0
0456	1	1	1	0	0
0459	1	5	2	0	0
0465	2	5	2	0	0
0467	2	1	1	0	1
0468	1	1	1	0	1
0469	2	5	2	0	1
0470	1	5	2	0	1
0471	1		2	0	0
0472	2	6	3	0	0
0473	2	5	2	1	1
0474	2	1	1	0	0
0475	2	6	3	0	1
0476	2	1	1	0	0
0477	2	5	2	0	0
0478	3	10	2	0	1
0479	1	1	1	1	0
0480	3	6	3	1	1
0482	2	6	3	1	0
0484	1	5	2	0	1
0488	2	5	2	0	0
0489	2	1	1	0	1
0490	2	6	3	0	0
0491	1	5	2	0	0
0492	2	9	3	1	1
0493	2	5	2	0	0
0494	2	6	3	1	0
0495	2	6	3	1	1
0496	1	1	1	0	0
